# Supplementary material for: Difficult colonoscopy: air, carbon dioxide, or water insufflation?
Source: PubMed Central journal article supplement — Intest Res. 2018 Apr 30;16(2):299–305. doi: 10.5217/ir.2018.16.2.299 (PMC5934604; doi:10.5217/ir.2018.16.2.299), 2018-04-30
Supplement: ir-16-299-s002.pdf [file ir-16-299-s002.pdf]

See “Difficult colonoscopy: air, carbon dioxide, or water insufflation?” on page 299.

**Supplementary Table 2.** Overall Analysis for Primary and Secondary Endpoints

| End points                  | Air insufflation<br>(n=52) | Carbon dioxide<br>insufflation (n=48) | Water insufflation<br>(n=53) | <i>P</i> -value <sup>a</sup> | <i>P</i> -value <sup>b</sup> | <i>P</i> -value <sup>c</sup> | <i>P</i> -value <sup>d</sup> |
|-----------------------------|----------------------------|---------------------------------------|------------------------------|------------------------------|------------------------------|------------------------------|------------------------------|
| Pain and sedation           |                            |                                       |                              |                              |                              |                              |                              |
| Primary end point           | 17 (32.7)                  | 21 (43.8)                             | 45 (84.9)                    | <0.001                       | 0.210                        | <0.001                       | <0.001                       |
| Pain score                  | 5.17                       | 4.72                                  | 3.93                         | <0.001                       | 0.090                        | <0.001                       | 0.001                        |
| Sedation                    | 5 (9.6)                    | 7 (14.6)                              | 2 (3.8)                      | 0.110                        |                              |                              |                              |
| Secondary end point         |                            |                                       |                              |                              |                              |                              |                              |
| Cecal intubation rate       | 45 (86.5)                  | 37 (77.1)                             | 45 (84.9)                    | 0.450                        |                              |                              |                              |
| Cecal intubation time (min) | 23.42                      | 23.35                                 | 21.00                        | 0.140                        |                              |                              |                              |
| Pain scores (on VAS)        |                            |                                       |                              |                              |                              |                              |                              |
| Rectosigmoid junction       | 5.81                       | 5.95                                  | 4.65                         | <0.001                       | 0.860                        | <0.001                       | <0.001                       |
| Splenic flexure             | 6.36                       | 5.65                                  | 4.69                         | <0.001                       | 0.110                        | <0.001                       | 0.018                        |
| Hepatic flexure             | 3.57                       | 3.00                                  | 2.69                         | 0.006                        | 0.570                        | 0.005                        | 0.110                        |
| Withdrawal                  | 1.81                       | 1.25                                  | 1.89                         | <0.001                       | 0.001                        | 0.840                        | <0.001                       |
| Abdominal compression       | 36 (69.2)                  | 29 (60.4)                             | 27 (50.9)                    | 0.160                        |                              |                              |                              |
| Change in position          | 31 (59.6)                  | 32 (66.7)                             | 31 (58.5)                    | 0.760                        |                              |                              |                              |

Values are presented as number (%) or mean.

<sup>a</sup>Overall.

<sup>b</sup>Air and carbon dioxide.

<sup>c</sup>Air and water.

<sup>d</sup>Carbon dioxide and water.

VAS, visual analogue scale.
