# Supplementary material for: Difficult colonoscopy: air, carbon dioxide, or water insufflation?
Source: PubMed Central journal article supplement — Intest Res. 2018 Apr 30;16(2):299–305. doi: 10.5217/ir.2018.16.2.299 (PMC5934604; doi:10.5217/ir.2018.16.2.299), 2018-04-30
Supplement: ir-16-299-s005.pdf [file ir-16-299-s005.pdf]

See “Difficult colonoscopy: air, carbon dioxide, or water insufflation?” on page 299.

**Supplementary Table 5.** Analysis for Primary and Secondary Endpoints (Post-Surgery)

| End points                  | Air insufflation<br>(n=23) | Carbon dioxide<br>insufflation (n=18) | Water insufflation<br>(n=22) | <i>P</i> -value <sup>a</sup> | <i>P</i> -value <sup>b</sup> | <i>P</i> -value <sup>c</sup> | <i>P</i> -value <sup>d</sup> |
|-----------------------------|----------------------------|---------------------------------------|------------------------------|------------------------------|------------------------------|------------------------------|------------------------------|
| Pain and sedation           |                            |                                       |                              |                              |                              |                              |                              |
| Primary end point           | 9 (39.1)                   | 9 (50.0)                              | 17 (77.3)                    | 0.031                        | 0.486                        | 0.009                        | 0.072                        |
| Pain score                  | 5.11                       | 4.80                                  | 3.81                         | <0.001                       | 0.390                        | <0.001                       | <0.001                       |
| Sedation                    | 5 (21.7)                   | 4 (22.2)                              | 3 (13.6)                     | 0.720                        |                              |                              |                              |
| Secondary end point         |                            |                                       |                              |                              |                              |                              |                              |
| Cecal intubation rate       | 22 (95.7)                  | 15 (83.3)                             | 21 (95.5)                    | 0.270                        |                              |                              |                              |
| Cecal intubation time (min) | 25.14                      | 25.11                                 | 20.86                        | 0.020                        | 0.790                        | 0.040                        | 0.060                        |
| Pain score (on VAS)         |                            |                                       |                              |                              |                              |                              |                              |
| Rectosigmoid junction       | 5.93                       | 5.80                                  | 4.58                         | <0.001                       | 0.930                        | <0.001                       | 0.003                        |
| Splenic flexure             | 6.48                       | 6.08                                  | 4.52                         | <0.001                       | 0.610                        | <0.001                       | 0.001                        |
| Hepatic flexure             | 3.43                       | 3.00                                  | 2.64                         | 0.150                        |                              |                              |                              |
| Withdrawal                  | 1.91                       | 1.29                                  | 1.96                         | 0.010                        | 0.030                        | 0.970                        | 0.020                        |
| Abdominal compression       | 14 (60.9)                  | 7 (38.9)                              | 12 (54.5)                    | 0.364                        |                              |                              |                              |
| Change in position          | 18 (78.2)                  | 14 (77.8)                             | 18 (81.8)                    | 0.939                        |                              |                              |                              |

Values are presented as number (%) or mean.

<sup>a</sup>Overall.

<sup>b</sup>Air and carbon dioxide.

<sup>c</sup>Air and water.

<sup>d</sup>Carbon dioxide and water.

VAS, visual analogue scale.
